# Supplementary material
Source: MDPI journal article supplement (https://www.mdpi.com/2071-1050/11/22/6485)
Supplement: s1 [file s1]

## Supplementary material A

The units of the following results were the inputs of per kilogram live pig (IKG).

Note: The mean final live weight of pigs in EPRS A, B and C was 114.25 kg, 115.00 kg and 88.63 kg, respectively. The whole pigpen could hold 80 pigs at once. Each year this pigpen produced 2 groups. In this study, 4 pigs were fed in one small pen which was 20m<sup>2</sup>. Average quantity showed the data per pig. Meteorological data came from the database of the Yucheng Comprehension Experiment Station (YCES).

1. Sun (pig rearing): Insolation = 4.936E+9 J/m<sup>2</sup>/year. Land area = 20m<sup>2</sup>/pen ÷ 4 pigs/pen = 5 m<sup>2</sup>. Albedo of the land = 20 % (Hu et al. 2010). Energy (J) = 4.936E+9 J/m<sup>2</sup>/year × (1-20 %) × 5 m<sup>2</sup> × 168/365.25 = 9.09E+9 J. IKG of EPRS A = 9.09E+9 J/114.25 = 7.95E+7 J; IKG of EPRS B = 9.09E+9 J/115.00 = 7.90E+7 J; IKG of EPRS C = 9.09E+9 J/88.63 = 1.05E+8 J.
2. Wind, kinetic energy (pig rearing): Air density = 1.23 kg/m<sup>3</sup>. Land area = 5 m<sup>2</sup>. Drag coefficient = 0.002 (Chen, B., 2009). Wind speed = 2.413 m/s. Energy (J) = 5 m<sup>2</sup> × 0.002 × 1.23 kg/m<sup>3</sup> × (2.413 m/s)<sup>3</sup> × (168 × 24 × 3600) s = 2.51E+06 J. IKG of EPRS A = 2.20E+04 J; IKG of EPRS B = 2.18E+04 J; IKG of EPRS C = 2.90E+04 J.
3. Rain (pig rearing): Rainfall = 0.451 m. Land area = 5 m<sup>2</sup>. Gibbs free energy of the water = 4900 J/kg. Energy (J) = 0.451 m × 5 m<sup>2</sup> × 1000 kg/m<sup>3</sup> × 4900 J/kg × 168/365.25 = 5.09E+06 J. IKG of EPRS A = 4.46E+04 J; IKG of EPRS B = 4.43E+04 J; IKG of EPRS C = 5.88E+04 J.
4. Ground water: Average quantity = 9.14E+02 kg. Gibbs free energy of the water = 4900 J/kg. Energy (J) = 9.14E+02 kg × 4900 J/kg = 4.48E+06 J. IKG of EPRS A = 3.92E+04 J; IKG of EPRS B = 3.89E+04 J; IKG of EPRS C = 5.17E+04 J.
5. Piglet: Tuhe black piglet average weight = 10.65 kg; Three-breed crossbred piglet average weight = 26.21 kg. IKG of EPRS A = 2.29E-01 kg; IKG of EPRS B = 2.28E-01 kg; IKG of EPRS C = 1.23E-01 kg.
6. Maize silage: IKG of EPRS A = 0/114.25 kg = 0 kg. IKG of EPRS B = 136.10/115 kg = 1.18E+03 kg. IKG of EPRS C = 124.45/88.63 kg = 1.44E+03 kg.
7. Maize grain: IKG of EPRS A = 272.41/114.25 kg = 2.38E+03 g. IKG of EPRS B = 136.78/115 kg = 1.19E+03 g. IKG of EPRS C = 124.52/88.63 kg = 1.44E+03 g.
8. Wheat bran: IKG of EPRS A = 38.10/114.25 kg = 3.33E+02 g. IKG of EPRS B = 37.86/115 kg = 3.29E+02 g. IKG of EPRS C = 34.55/88.63 kg = 3.99E+02 g.
9. Soya bean meal: IKG of EPRS A = 70.51/114.25 kg = 6.17E+02 g. IKG of EPRS B = 67.83/115 kg = 5.90E+02 g. IKG of EPRS C = 38.10/88.63 kg = 7.15E+02 g.
10. Disinfectants: Disinfectants used only once before purchased piglets entered the pigpens. Average quantity = 27.78 g. IKG of EPRS A = 27.78 g/114.25 = 2.43E-01 g. IKG of EPRS B = 27.78 g/115 = 2.42E-01 g. IKG of EPRS C = 27.78 g/88.63 = 3.21E-01 g.
11. Micro-biological additives: Materials which is a kind of fermentation materials used for in the daily disinfection instead of the disinfectants. Given uncertainty in the production process, the UEV and RNF came from the bio-alcohol process. Average quantity = ¥34.97. IKG of EPRS A = ¥34.97/114.25 = ¥3.06E-01. IKG of EPRS B = ¥34.97/115 = ¥3.04E-01. IKG of EPRS C = ¥34.97/88.63 = ¥4.04E-02.
12. Vaccine: The three-breed crossbred piglets from EPRS A developed foot and mouth disease

13. Electricity: Average quantity = 0.31 kWh per live pig. Electricity (J) = 0.31 kWh  $\times$  1.25E+07 J/kWh = 3.89E+06 J. IKG of EPRS A = 3.40E+04 J; IKG of EPRS B = 3.38E+04 J; IKG of EPRS C = 4.49E+04 J.
14. Steel: Total pigpen used 2.88t steel with 25-year working life(GB50352-2005). This pigpen can hold 80 pigs at once. Each year this pigpen produced 2 groups. Average quantity per live pig=7.2E+2 g. IKG of EPRS A = 6.30 g; IKG of EPRS B = 6.26 g; IKG of EPRS C = 8.31 g.
15. Glass: Total weight=105 kg with 25-year working life (GB50352-2005). This pigpen can hold 80 pigs at once. Each year this pigpen produced 2 groups. Average quantity per live pig=26.25 g. IKG of EPRS A = 0.23 g; IKG of EPRS B =0.228 g; IKG of EPRS C = 3.03 g.
16. Concrete: Total weight=20.5t with 25-year working life (GB50352-2005). This pigpen can hold 80 pigs at once. Each year this pigpen produced 2 groups. Average quantity per live pig=5.13E+03 g. IKG of EPRS A =44.90 g; IKG of EPRS B = 44.61 g; IKG of EPRS C = 59.22 g.
17. Labor: Conversion of the labor = 1.26E+07 J/day (Chen et al. 2011).This pigpen needs 1.5 h labor/day, and each worker works 8 hours per day. Average quantity =1.5h/day\*168 days $\div$  8h/day $\div$  80 pigs= 0.391 days/pig. Labor (J) = 0.391 days  $\times$  1.26E+07 J/day = 4.93E+06 J. IKG of EPRS A =4.30E+04 J; IKG of EPRS B = 4.26E+04 J; IKG of EPRS C =5.66E+04 J.
18. Building investment: Total assets input= ¥5000. Such pigpens with 25-year working life (GB50352-2005), This pigpen can hold 80 pigs at once. Each year this pigpen produced 2 groups. Average quantity = ¥5000/(80pigs/batch\*2batchs/year\*25year)=¥1.25. IKG of EPRS A = ¥1.09E-02. IKG of EPRS B=¥1.09E-02. IKG of EPRS C = ¥1.44E-02.
19. Facilities investment: Total assets input=10000 CNY, Such pigpens with 10 years' working life(Wang et al. 2014), This pigpen can hold 80 pigs at once. Each year this pigpen produced 2 groups. Average quantity = ¥10000/(80pigs/batch\*2batchs/year\*10year)= ¥6.25 per pig, IKG of EPRS A = ¥5.46E-02. IKG of EPRS B= ¥5.42E-02. IKG of EPRS C = ¥7.20E-02.
20. Medicine: EPRS A consumed ¥98, EPRS B consumed ¥30; EPRS C consumed ¥20. IKG of EPRS A =¥8.58E-01. IKG of EPRS B=¥2.61E-01. IKG of EPRS C = ¥3.24E-01

| Items                        | Unit | RNF | UEV <sup>a</sup> | Wheat    |          | Grain Maize |          | Silage maize |          |
|------------------------------|------|-----|------------------|----------|----------|-------------|----------|--------------|----------|
|                              |      |     |                  | Raw data | Emergy   | Raw data    | Emergy   | Raw data     | Emergy   |
| Natural environmental inputs |      |     |                  |          |          |             |          |              |          |
| Sun <sup>b</sup>             | J    | 1   | 1.00E+00         | 2.52E+13 | 2.52E+13 | 1.67E+13    | 1.67E+13 | 1.42E+13     | 1.42E+13 |
| Wind <sup>b</sup>            | J    | 1   | 1.86E+03         | 8.19E+09 | 1.53E+13 | 2.40E+09    | 4.47E+12 | 2.04E+09     | 3.80E+12 |
| Rain <sup>b</sup>            | J    | 1   | 2.36E+04         | 1.49E+10 | 3.50E+14 | 7.25E+09    | 1.71E+14 | 6.17E+09     | 1.45E+14 |
| River water                  | J    | 1   | 1.86E+05         | 3.68E+09 | 6.84E+14 | 1.47E+09    | 2.73E+14 | 1.47E+09     | 2.73E+14 |
| Purchased materials          |      |     |                  |          |          |             |          |              |          |

|                            |                                                                                |      |          |          |          |          |          |          |          |
|----------------------------|--------------------------------------------------------------------------------|------|----------|----------|----------|----------|----------|----------|----------|
| N fertiliser <sup>c</sup>  | g                                                                              | 0    | 4.85E+09 | 1.53E+05 | 7.42E+14 | 2.34E+05 | 1.13E+15 | 1.64E+05 | 7.95E+14 |
| P fertiliser <sup>c</sup>  | g                                                                              | 0    | 4.98E+09 | 1.80E+05 | 8.96E+14 | 1.08E+05 | 5.38E+14 | 8.64E+04 | 4.30E+14 |
| K fertiliser <sup>c</sup>  | g                                                                              | 0    | 1.41E+09 | 4.50E+04 | 6.35E+13 | 9.00E+04 | 1.27E+14 | 8.10E+04 | 1.14E+14 |
| Herbicide                  | g                                                                              | 0    | 1.89E+10 | 3.00E-01 | 5.67E+09 | 1.50E+03 | 2.84E+13 | 1.50E+03 | 2.84E+13 |
| Pesticides                 | g                                                                              | 0    | 1.89E+10 | 8.45E+01 | 1.60E+12 | 9.00E+01 | 1.70E+12 | 0.00E+00 | 0.00E+00 |
| Micro-biological additives | ¥                                                                              | 0.2  | 3.31E+11 | 0.00E+00 | 0.00E+00 | 0.00E+00 | 0.00E+00 | 3.66E-01 | 1.21E+11 |
| Diesel(harvest)            | J                                                                              | 0    | 8.44E+04 | 1.65E+09 | 1.39E+14 | 1.65E+09 | 1.39E+14 | 1.80E+09 | 1.52E+14 |
| Diesel(sowing)             | J                                                                              | 0    | 8.44E+04 | 6.38E+08 | 5.38E+13 | 6.38E+08 | 5.38E+13 | 6.38E+08 | 5.38E+13 |
| Plastic film               | g                                                                              | 0    | 4.83E+08 | 0.00E+00 | 0.00E+00 | 0.00E+00 | 0.00E+00 | 4.01E+04 | 1.94E+13 |
| Electricity                | J                                                                              | 0.09 | 2.18E+05 | 2.09E+09 | 4.56E+14 | 2.09E+09 | 4.56E+14 | 2.09E+09 | 4.56E+14 |
| Seed                       | J                                                                              | 1    | 8.44E+04 | 4.89E+09 | 4.13E+14 | 3.53E+08 | 2.98E+13 | 3.53E+08 | 2.98E+13 |
| Facilities                 | ¥                                                                              | 0.05 | 3.31E+11 | 2.01E+01 | 6.65E+12 | 2.01E+01 | 6.65E+12 | 2.21E+01 | 7.32E+12 |
| Labor                      | J                                                                              | 0.6  | 5.75E+06 | 8.99E+07 | 5.17E+14 | 8.99E+07 | 5.17E+14 | 5.43E+07 | 3.12E+14 |
| Total inputs               | seJ                                                                            |      |          | 4.32E+15 |          | 3.48E+15 |          | 2.82E+15 |          |
| Outputs                    |                                                                                |      |          |          |          |          |          |          |          |
| Production                 | g                                                                              |      |          | 5.63E+06 |          | 6.00E+06 |          | 1.74E+07 |          |
| UEV                        | SeJ/g                                                                          |      |          | 7.68E+08 |          | 5.79E+08 |          | 1.62E+08 |          |
| Note:                      | <sup>a</sup> :The baseline used in this study is12.00E+24seJ/year standard.    |      |          |          |          |          |          |          |          |
|                            | <sup>b</sup> : Only the highest value of wind and rain was considered.         |      |          |          |          |          |          |          |          |
|                            | <sup>c</sup> : Compound fertiliser was calculated by its composition of N,P,K. |      |          |          |          |          |          |          |          |

**Table S2 Energy flows of the planting systems (ha<sup>-1</sup>)**

| Energy flows                       | Wheat    |        | Grain maize |        | Silage maize |        |
|------------------------------------|----------|--------|-------------|--------|--------------|--------|
| Total energy inputs(U)             | 4.32E+15 |        | 3.48E+15    |        | 2.82E+15     |        |
| Total renewable energy flows(R)    | 1.80E+15 | 41.63% | 8.26E+14    | 23.76% | 6.78E+14     | 24.05% |
| Total nonrenewable energy flows(N) | 2.52E+15 | 58.37% | 2.65E+15    | 76.24% | 2.14E+15     | 75.95% |
| UEV(seJ/g)                         | 7.68E+08 |        | 5.79E+08    |        | 1.62E+08     |        |
| RNF                                | 0.416    |        | 0.238       |        | 0.241        |        |

**Table S3 Details for UEV and RNF calculated for the wheat bran production system (per kg wheat bran)**

| Items        | Unit | RNF  | UEV      | Raw data | Emergy   |
|--------------|------|------|----------|----------|----------|
| Ground water | J    | 0.00 | 1.86E+05 | 9.80E+02 | 2.40E+08 |
| Wheat        | g    | 0.40 | 7.68E+08 | 5.00E+03 | 3.84E+12 |
| Electricity  | J    | 0.09 | 2.18E+05 | 4.32E+05 | 1.24E+11 |
| Plastic bags | g    | 0.00 | 4.83E+08 | 2.00E+00 | 1.27E+09 |
| Labor        | J    | 0.60 | 5.75E+06 | 3.15E+04 | 2.38E+11 |
| Building     | ¥    | 0.05 | 3.31E+11 | 5.69E-04 | 1.88E+08 |
| Facilities   | ¥    | 0.05 | 3.31E+11 | 3.99E-03 | 1.32E+09 |

|                                 |                                                                 |          |
|---------------------------------|-----------------------------------------------------------------|----------|
| Total inputs                    | seJ                                                             | 4.21E+12 |
| Total nonrenewable energy flows | seJ                                                             | 2.50E+12 |
| Total renewable energy flows    | seJ                                                             | 1.71E+12 |
| UEV                             | seJ/g                                                           | 8.41E+8  |
| RNF                             |                                                                 | 0.406    |
| Note:                           | The baseline used in this study is 12.00E+24 seJ/year standard. |          |

### Supplementary material C

This section shows economic costs of the pig raising and planting systems

**Table S4 Cost details of the pig raising system**

| Item                       | Unit | EPRS A   | EPRS B   | EPRS C   |
|----------------------------|------|----------|----------|----------|
| Piglets                    | ¥    | 4.57E+00 | 4.54E+00 | 7.38E+00 |
| Maize silage               | ¥    | 0.00E+00 | 3.04E-01 | 3.69E-01 |
| Maize grain                | ¥    | 1.78E+00 | 8.35E-01 | 1.07E+00 |
| Wheat bran                 | ¥    | 6.33E-02 | 6.24E-02 | 6.24E-02 |
| Soya bean meal             | ¥    | 1.80E+00 | 1.72E+00 | 2.09E+00 |
| Vaccine                    | ¥    | 5.95E-03 | 2.96E-02 | 3.92E-02 |
| Disinfectants              | ¥    | 9.73E-04 | 9.66E-04 | 1.28E-03 |
| Micro-biological additives | ¥    | 3.06E-01 | 3.04E-01 | 4.04E-01 |
| Electricity                | ¥    | 5.17E-03 | 5.14E-03 | 6.82E-03 |
| Steel                      | ¥    | 3.28E-02 | 3.26E-02 | 4.33E-02 |
| Concrete                   | ¥    | 8.32E-03 | 8.26E-03 | 1.10E-02 |
| Glass                      | ¥    | 4.90E-04 | 4.87E-04 | 6.46E-04 |
| Building                   | ¥    | 1.09E-02 | 1.09E-02 | 1.44E-02 |
| Facilities                 | ¥    | 5.47E-02 | 5.43E-02 | 7.22E-02 |
| Medicine                   | ¥    | 8.58E-01 | 2.61E-01 | 2.31E-01 |
| Labor                      | ¥    | 8.11E-04 | 8.05E-04 | 1.07E-03 |
| Total cost                 | ¥    | 9.50E+00 | 8.18E+00 | 1.18E+01 |
| <b>outputs</b>             |      |          |          |          |
| pig                        | ¥/Kg | 1.14E+02 | 1.15E+02 | 8.66E+01 |

**Table S5 Cost details of the planting systems**

| Item                       | Unit | Wheat (ha <sup>-1</sup> ) | maize(ha <sup>-1</sup> ) | Maize silage(ha <sup>-1</sup> ) | Flour milling<br>(kg wheat bran <sup>-1</sup> ) |
|----------------------------|------|---------------------------|--------------------------|---------------------------------|-------------------------------------------------|
| Compound fertiliser        | ¥    | 2.04E+03                  | 2.04E+03                 | 1.43E+03                        | 0.00E+00                                        |
| Herbicide                  | ¥    | 2.25E+02                  | 2.25E+02                 | 2.25E+02                        | 0.00E+00                                        |
| Pesticide                  | ¥    | 5.63E+00                  | 6.00E+00                 | 0.00E+00                        | 0.00E+00                                        |
| Micro-biological additives | ¥    | 0.00E+00                  | 0.00E+00                 | 1.50E+02                        | 0.00E+00                                        |

|                       |      |          |          |          |          |
|-----------------------|------|----------|----------|----------|----------|
| Diesel(harvest)       | ¥    | 2.18E+02 | 2.18E+02 | 2.37E+01 | 0.00E+00 |
| Diesel(sowing)        | ¥    | 8.37E+01 | 8.37E+01 | 8.37E+01 | 0.00E+00 |
| Plastic film/bags     | ¥    | 0.00E+00 | 0.00E+00 | 7.50E+02 | 1.00E-01 |
| Electricity           | ¥    | 2.70E+02 | 2.70E+02 | 2.70E+02 | 1.31E-02 |
| Seeds                 | ¥    | 1.20E+03 | 1.05E+03 | 1.05E+03 | 0.00E+00 |
| Facilities & building | ¥    | 3.00E+02 | 3.00E+02 | 3.27E+02 | 4.56E-03 |
| Labor                 | ¥    | 2.85E+02 | 2.85E+02 | 1.73E+02 | 1.00E-02 |
| Total cost            | ¥    | 4.62E+03 | 4.47E+03 | 4.49E+03 | 1.26E-01 |
| Outputs               |      |          |          |          |          |
| Dry weight            | kg   | 5.63E+03 | 6.00E+03 | 1.74E+04 | 5.00E+00 |
| Cost                  | ¥/kg | 8.22E-01 | 7.46E-01 | 2.57E-01 | 1.26E-01 |

Note: 5 kg wheat could produce 4kg flour and 1kg wheat bran. So in this study we calculated the cost of the wheat bran =1/5(wheat cost + milling cost) =1.89E-1 ¥/kg,

#### Supplementary material D

This section shows data for soil organic carbon for the past 3 years from the database of the Yucheng Comprehension Experiment Station. This data is support materials to 2.4 part to clarify the reason why we delete the item of soil erosion.

**Table S6. Soil organic carbon (SOC, g/kg) data for fields planted without and with fertiliser from 2012-2014**

| Date        | Without fertiliser | With fertiliser |
|-------------|--------------------|-----------------|
| 12 Jun 2012 | 17.26              | 17.26           |
| 12 Oct 2012 | 16.70              | 16.70           |
| 13 Jun 2013 | 16.52              | 16.52           |
| 13 Oct 2013 | 16.63              | 17.15           |
| 14 Jun 2014 | 16.96              | 16.96           |
| 14 Oct 2014 | 17.51              | 16.92           |

#### Supplementary material E

This section shows the basic principle of the L1 and L2 calculative processes (Fig. S1). Though the purpose of two calculative processes is both to get the maximum ping raised number supported by 1 ha land per year. The calculative processes are entirely different.

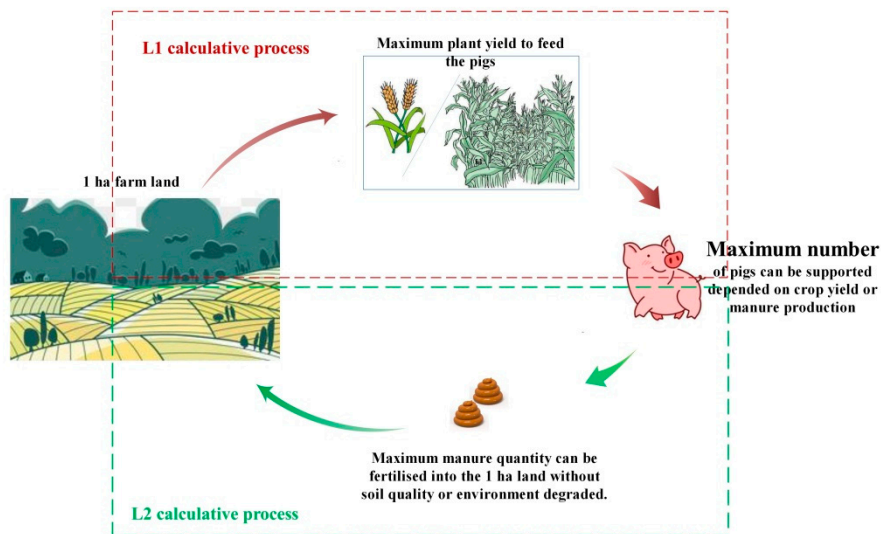

**Fig. S1 basic principle of the L1 and L2 calculative processes**

## Reference

- Chen, D., M. Webber, J. Chen, and Z. Luo. 2011. Emergy evaluation perspectives of an irrigation improvement project proposal in China. *Ecological Economics* **70**:2154-2162.
- GB50352-2005. Code for design of civil buildings GB50352-2005.
- Hu, S., X. G. Mo, Z. H. Lin, and J. X. Qiu. 2010. Emergy Assessment of a Wheat-Maize Rotation System with Different Water Assignments in the North China Plain. *Environmental Management* **46**:643-657.
- Wang, X., Y. Chen, P. Sui, W. Gao, F. Qin, X. Wu, and J. Xiong. 2014. Efficiency and sustainability analysis of biogas and electricity production from a large-scale biogas project in China: an emergy evaluation based on LCA. *Journal of Cleaner Production* **65**:234-245.
